# Supplementary material for: Development of Observation-based Global Multi-layer Soil MoistureProducts for 1970 to 2016
Source: Copernicus journal article supplement (doi:10.5194/essd-2021-84), 2021-03-16
Supplement: Supplementary file 1 [file essd-2021-84-supplement.pdf]

*Supplementary Materials for:*

## **Development of Observation-based Global Multi-layer Soil Moisture Products for 1970 to 2016**

5 Yaoping Wang<sup>1,2</sup>, Jiafu Mao<sup>2,\*</sup>, Mingzhou Jin<sup>1,3</sup>, Forrest M. Hoffman<sup>4</sup>, Xiaoying Shi<sup>2</sup>, Stan D. Wullschleger<sup>2</sup>, and Yongjiu Dai<sup>5</sup>

<sup>1</sup> Institute for a Secure and Sustainable Environment, University of Tennessee, Knoxville, TN, USA 37902

<sup>2</sup> Environmental Sciences Division and Climate Change Science Institute, Oak Ridge National Laboratory, Oak Ridge, TN, USA 37830

<sup>3</sup> Department of Industrial and Systems Engineering, University of Tennessee, Knoxville, USA 37996

10 <sup>4</sup> Computational Sciences and Engineering Division and Climate Change Science Institute, Oak Ridge National Laboratory, Oak Ridge, TN, USA 37830

<sup>5</sup> School of Atmospheric Sciences, Sun Yat-sen University, Guangzhou, China 519082

*Correspondence to:* Jiafu Mao (1 Bethel Valley Rd, Oak Ridge, TN 37830; [maoj@ornl.gov](mailto:maoj@ornl.gov))

**Table S1: List of satellite soil moisture products used in the merging.**

| Dataset                                    | Original resolution (°) | Original depth      | Used depth (cm) | Time period | Used time period     | Reference             |
|--------------------------------------------|-------------------------|---------------------|-----------------|-------------|----------------------|-----------------------|
| ESA CCI v4.5 (combined passive and active) | 0.25×0.25               | Top few centimeters | 0–10            | 1978–2018   | 1981–2016, 1981–2010 | (Dorigo et al., 2017) |

**Table S2: List of reanalysis soil moisture products used in the merging.**

| Dataset     | Original resolution | Original depth (cm)        | Interpolated depth (cm) | Time period | Used time period     | Reference               |
|-------------|---------------------|----------------------------|-------------------------|-------------|----------------------|-------------------------|
| GLEAM v3.3a | 0.25°×0.25°         | 0–10                       | 0–10                    | 1980–2018   | 1981–2016            | (Martens et al., 2017)  |
| CERA20C     | ~125 km             | 0–7, 7–28, 28–100, 100–289 | 0–10, 10–30             | 1900–2010   | 1981–2010, 1970–2010 | (Laloyaux et al., 2017) |
| ERA20C      | ~125 km             | 0–7, 7–28, 28–100, 100–255 | 0–10, 10–30             | 1900–2010   | 1981–2010, 1970–2010 | (Poli et al., 2016)     |
| ERA-Interim | ~80 km              | 0–7, 7–28, 28–100, 100–289 | 0–10, 10–30             | 1979–2018   | 1981–2016, 1981–2010 | (Dee et al., 2011)      |
| ERA5        | ~30 km              | 0–7, 7–28, 28–100, 100–289 | 0–10, 10–30             | 1979–2020   | 1981–2016, 1981–2010 | (Hersbach et al., 2020) |

20

**Table S3: List of offline LSM-simulated SM datasets used in the merging. The BG1 simulation of MsTMIP has time-varying climate, land use, atmospheric CO<sub>2</sub>, and nitrogen deposition forcings, whereas the SG3 forcing has constant nitrogen deposition. The S3 simulation of TRENDY v7 has time-varying climate, land use, atmospheric CO<sub>2</sub>, and, if the model has a nitrogen cycle, nitrogen deposition forcings.**

| Dataset                         | Simulation | Model        | Original resolution (°) | Original depth (cm, to the precision of 3 or 4 digits)                                                                                                    | Interpolated depth (cm)    | Time period | Used time period     | Reference                 |
|---------------------------------|------------|--------------|-------------------------|-----------------------------------------------------------------------------------------------------------------------------------------------------------|----------------------------|-------------|----------------------|---------------------------|
| GLDAS NOAH025 M2.0 <sup>†</sup> | GLDAS      | Noah-MP      | 0.25×0.25               | 0–10, 10–40, 40–100, 100–200                                                                                                                              | 0–10, 10–30, 30–50, 50–100 | 1948–2010   | 1970–2010, 1981–2010 | (Beaudoin et al., 2019)   |
| ERA-Interim/Land <sup>†</sup>   | —          | HTESSSEL     | 0.75×0.75               | 0–7, 7–28, 28–100, 100–289                                                                                                                                | 0–10, 10–30                | 1979–2010   | 1981–2010            | (Balsamo et al., 2015)    |
| MsTMIP                          | BG1        | CLASS-CTEM-N | 0.5×0.5                 | 0–10, 10–35, 35–400                                                                                                                                       | 0–10, 30–50                | 1901–2010   | 1970–2010            | (Huntzinger et al., 2018) |
|                                 | BG1        | CLM4         | 0.5×0.5                 | 0–0.18, 0.18–0.45, 0.45–0.91, 0.91–1.66, 1.66–2.89, 2.89–4.93, 4.93–8.29, 8.29–13.8, 13.8–23.0, 23.0–38.0, 38.0–62.8, 62.8–104, 104–171, 171–283, 283–421 | 0–10, 10–30                |             |                      |                           |
|                                 | BG1        | CLM4VIC      | 0.5×0.5                 | 0–1.75, 1.75–4.51, 4.51–9.06, 9.06–16.6, 16.6–28.9, 28.9–49.3, 49.3–82.9, 139–230, 230–380                                                                | 0–10, 10–30, 30–50, 50–100 |             |                      |                           |

| Dataset   | Simulation | Model         | Original resolution (°) | Original depth (cm, to the precision of 3 or 4 digits)                                                                                                                                                                                               | Interpolated depth (cm)    | Time period | Used time period                           | Reference            |
|-----------|------------|---------------|-------------------------|------------------------------------------------------------------------------------------------------------------------------------------------------------------------------------------------------------------------------------------------------|----------------------------|-------------|--------------------------------------------|----------------------|
|           | SG3        | SiBCASA       | 0.5×0.5                 | 0.0–2.0, 2.0–4.5, 4.5–7.5, 7.5–11.2, 11.2–15.8, 15.8–21.4, 21.4–28.3, 28.3–36.7, 36.7–47.1, 47.1–59.9, 59.9–75.7, 75.7–95.0, 95.0–119, 119–148, 148–184, 184–228, 228–282, 282–349, 349–430, 430–531, 531–655, 655–807, 807–993, 993–1223, 1223–1504 | 0–10, 10–30, 30–50, 50–100 |             |                                            |                      |
| TRENDY v7 | S3         | CLM5.0        | ~0.94×1.25              | 0–2, 2–6, 6–12, 12–20, 20–32, 32–48, 48–68, 68–92, 92–120, 120–152, 152–188, 188–228, 228–272, 272–326, 326–390, 390–464, 464–548, 548–642, 642–746, 746–860                                                                                         | 0–10, 10–30, 30–50, 50–100 | 1901–2017   | 1970–2016, 1970–2010, 1981–2010, 1981–2016 | (Sitch et al., 2008) |
|           |            | ISAM          | 0.5×0.5                 | 0.00–1.75, 1.75–4.51, 4.51–9.06, 9.06–16.6, 16.6–28.9, 28.9–49.3, 49.3–82.9, 82.9–138, 138–230, 230–343                                                                                                                                              | 0–10, 10–30, 30–50, 50–100 |             |                                            |                      |
|           |            | JSBACH        | ~1.86×1.875             | 0–6.5, 6.5–31.9, 31.9–123, 123–413, 413–983                                                                                                                                                                                                          | 0–10, 30–50                |             |                                            |                      |
|           |            | JULES         | 1.25×1.875              | 0–10, 10–35, 35–100, 100–300                                                                                                                                                                                                                         | 0–10, 10–30, 50–100        |             |                                            |                      |
|           |            | LPX-Bern      | 0.5×0.5                 | 0–10, 10–20, 20–30, 30–50, 50–70, 70–100, 100–150, 150–200                                                                                                                                                                                           | 0–10, 10–30, 30–50, 50–100 |             |                                            |                      |
|           |            | ORCHIDE E     | 2×2                     | 0–0.1, 0.1–0.4, 0.4–1, 1–2.2, 2.2–4.5, 4.5–9.2, 9.2–18.6, 18.6–37.4, 37.4–74.9, 74.9–150, 150–200                                                                                                                                                    | 0–10, 10–30, 30–50, 50–100 |             |                                            |                      |
|           |            | ORCHIDE E-CNP | 2×2                     | 0–0.1, 0.1–0.4, 0.4–1, 1–2.2, 2.2–4.5, 4.5–9.2, 9.2–18.6, 18.6–37.4, 37.4–74.9, 74.9–150, 150–200                                                                                                                                                    | 0–10, 10–30, 30–50, 50–100 |             |                                            |                      |

† Although the GLDAS is a data assimilation system, the “2.0” simulations do not use any data assimilation (Rui and Beaudoin, 2020). The ERA-Interim/Land is an offline run without data assimilation and forced with bias-corrected meteorological inputs from ERA-Interim (Balsamo et al., 2015).

**Table S4: List of coupled ESM-simulated SM datasets used in the merging. Only the first ensemble member (CMIP5 r1i1p1, CMIP6 r1i1p1f1) was used for all the models. All the models were used for 1970–2016 and the shorter periods (1970–2010, 1981–2016, 1981–2010) contained within. The CMIP5 historical experiment was used for 1970–2005, and the CMIP5 RCP8.5 for 2006–2016. The CMIP6 historical experiment was used for 1970–2014, and the CMIP6 SSP5-85 experiment for 2015–2016.**

| Dataset        | Model        | Original resolution (°)                                                                                                                                      | Original depth (cm, to the precision of 3 or 4 digits)                                                                                                                                   | Interpolated depth (cm)    | Reference             |
|----------------|--------------|--------------------------------------------------------------------------------------------------------------------------------------------------------------|------------------------------------------------------------------------------------------------------------------------------------------------------------------------------------------|----------------------------|-----------------------|
| CMIP5          | ACCESS1-0    | 1.25×1.875                                                                                                                                                   | 0–10, 10–35, 35–100, 100–300                                                                                                                                                             | 0–10, 30–50                | (Taylor et al., 2012) |
|                | ACCESS1-3    | 1.25×1.875                                                                                                                                                   | 0–2.2, 2.2–8, 8–23.4, 23.4–64.3, 64.3–173, 173–460                                                                                                                                       | 0–10, 10–30, 50–100        |                       |
|                | CanESM2      | ~2.79×2.81                                                                                                                                                   | 0–10, 10–35, 35–41                                                                                                                                                                       | 0–10, 30–50                |                       |
|                | CNRM-CM5     | ~1.40×1.40                                                                                                                                                   | 0–1, 1–20, 20–50, 50–100, 100–150, 150–200, 200–300, 300–800                                                                                                                             | 0–10, 10–30, 50–100        |                       |
|                | FGOALS-s2    | ~2.79×2.81                                                                                                                                                   | 0–1.75, 1.75–4.51, 4.51–9.06, 9.06–16.6, 16.6–28.9, 28.9–49.3, 49.3–82.9, 82.9–138, 138–230, 230–343                                                                                     | 0–10, 10–30, 30–50, 50–100 |                       |
|                | GFDL-CM3     | 2×2.5                                                                                                                                                        | 0–2, 2–6, 6–10, 10–15, 15–20, 20–30, 30–40, 40–60, 60–80, 80–100, 100–140, 140–180, 180–220, 220–260, 260–300, 300–400, 400–500, 500–600, 600–750, 750–1000                              | 0–10, 10–30, 30–50, 50–100 |                       |
|                | GFDL-ESM2G   | ~2×2                                                                                                                                                         |                                                                                                                                                                                          |                            |                       |
|                | GFDL-ESM2M   | ~2×2.5                                                                                                                                                       |                                                                                                                                                                                          |                            |                       |
|                | GISS-E2-H-CC | 2×2.5                                                                                                                                                        |                                                                                                                                                                                          |                            |                       |
|                | GISS-E2-H    | 2×2.5                                                                                                                                                        | 0–10, 10–27.3, 27.3–57.0, 57.0–108, 108–197, 197–350                                                                                                                                     | 0–10, 10–30, 50–100        |                       |
|                | GISS-E2-R-CC | 2×2.5                                                                                                                                                        |                                                                                                                                                                                          |                            |                       |
|                | GISS-E2-R    | 2×2.5                                                                                                                                                        |                                                                                                                                                                                          |                            |                       |
|                | HadGEM2-ES   | 1.25×1.875                                                                                                                                                   | 0–10, 10–35, 35–67.5, 67.5–300                                                                                                                                                           | 0–10, 30–50, 50–100        |                       |
|                | HadGEM2-CC   | 1.25×1.875                                                                                                                                                   |                                                                                                                                                                                          |                            |                       |
|                | inmcm4       | 1.5×2                                                                                                                                                        | 0.5–1.5, 1.5–3, 3–6, 6–11.5, 11.5–20, 20–30, 30–40, 40–50, 50–60, 60–70, 70–80, 80–90, 90–100, 100–110, 110–120, 120–130, 130–140, 140–150, 150–178, 178–250, 250–400, 400–750, 750–1500 | 0–10, 10–30, 30–50, 50–100 |                       |
| MIROC5         | 1.40×1.40    |                                                                                                                                                              |                                                                                                                                                                                          |                            |                       |
| MIROC-ESM      | ~2.79×2.81   | 0–5, 5–25, 25–100, 100–200, 200–400, 400–1400                                                                                                                | 0–10, 10–30                                                                                                                                                                              |                            |                       |
| MIROC-ESM-CHEM | ~2.79×2.81   |                                                                                                                                                              |                                                                                                                                                                                          |                            |                       |
| NorESM1-ME     | ~1.89×2.5    | 0–1.75, 1.75–4.51, 4.51–9.06, 9.06–16.6, 16.6–28.9, 28.9–49.3, 49.3–82.9, 82.9–138.3, 138.3–230, 230–380, 380–628, 628–1038, 1038–1712, 1712–2825, 2825–4210 | 0–10, 10–30, 30–50, 50–100                                                                                                                                                               |                            |                       |
| CMIP6          | BCC-CSM2-MR  | ~1.12×1.125                                                                                                                                                  | 0–1.75, 1.75–4.51, 4.51–9.06, 9.06–16.5, 16.5–28.9, 28.9–49.3, 49.3–82.9, 82.9–138, 138–230, 230–343                                                                                     | 0–10, 10–30, 30–50, 50–100 | (Eyring et al., 2016) |
|                | CanESM5      | ~2.79×2.81                                                                                                                                                   | 0–10, 10–35, 35–410                                                                                                                                                                      | 0–10, 30–50                |                       |
|                | CESM2        | ~0.94×1.25                                                                                                                                                   | 0–2.5, 2.5–6.5, 6.5–12.5, 12.5–21, 21–33, 33–49, 49–69, 69–93, 93–121, 121–153, 153–189, 189–229, 229–274, 274–328, 328–392, 392–466, 466–550, 550–644, 644–748, 748–858                 | 0–10, 10–30, 30–50, 50–100 |                       |
|                | CESM2-WACCAM | ~0.94×1.25                                                                                                                                                   |                                                                                                                                                                                          |                            |                       |
|                | EC-Earth3    | ~0.70×0.70                                                                                                                                                   | 0–7, 7–28, 28–100, 100–289                                                                                                                                                               | 0–10, 10–30                |                       |
| EC-Earth3-Veg  | ~0.70×0.70   |                                                                                                                                                              |                                                                                                                                                                                          |                            |                       |

| Dataset | Model         | Original resolution (°) | Original depth (cm, to the precision of 3 or 4 digits)                                            | Interpolated depth (cm)    | Reference |
|---------|---------------|-------------------------|---------------------------------------------------------------------------------------------------|----------------------------|-----------|
|         | IPSL-CM6A-LR  | ~1.27×2.5               | 0–0.1, 0.1–0.4, 0.4–1, 1–2.2, 2.2–4.5, 4.5–9.2, 9.2–18.6, 18.6–37.4, 37.4–74.9, 74.9–150, 150–200 | 0–10, 10–30, 30–50, 50–100 |           |
|         | MIROC6        | ~1.4×1.4                | 0–5, 5–25, 25–100, 100–200, 200–400, 400–1400                                                     | 0–10, 10–30                |           |
|         | MPI-ESM1-2-HR | ~0.94×0.94              | 0–6.5, 6.5–31.9, 31.9–123, 123–413, 413–983                                                       | 0–10, 30–50                |           |

**Table S5: List of the corresponding temperature and precipitation forcings to the ORS SM datasets.**

| SM dataset                                 | Temperature and precipitation dataset | Reference                |
|--------------------------------------------|---------------------------------------|--------------------------|
| ESA CCI v4.5 (combined passive and active) | CRU TS v4.03                          | (Harris et al., 2014)    |
| GLEAM v3.3a                                |                                       |                          |
| CERA20C                                    | CERA20C                               | (Laloyaux et al., 2017)  |
| ERA20C                                     | ERA20C                                | (Poli et al., 2016)      |
| ERA-Interim                                | ERA-Interim                           | (Dee et al., 2011)       |
| ERA5                                       | ERA5                                  | (Hersbach et al., 2020)  |
| ERA-Land                                   | ERA-Interim                           | (Balsamo et al., 2015)   |
| GLDAS NOAH025_M2.0                         | GLDAS NOAH025_M2.0                    | (Beaudoing et al., 2019) |
| MsTMIP                                     | CRU TS v3.20                          | (Harris et al., 2014)    |
| TRENDY v7                                  | CRU TS v3.26                          | (Harris et al., 2014)    |

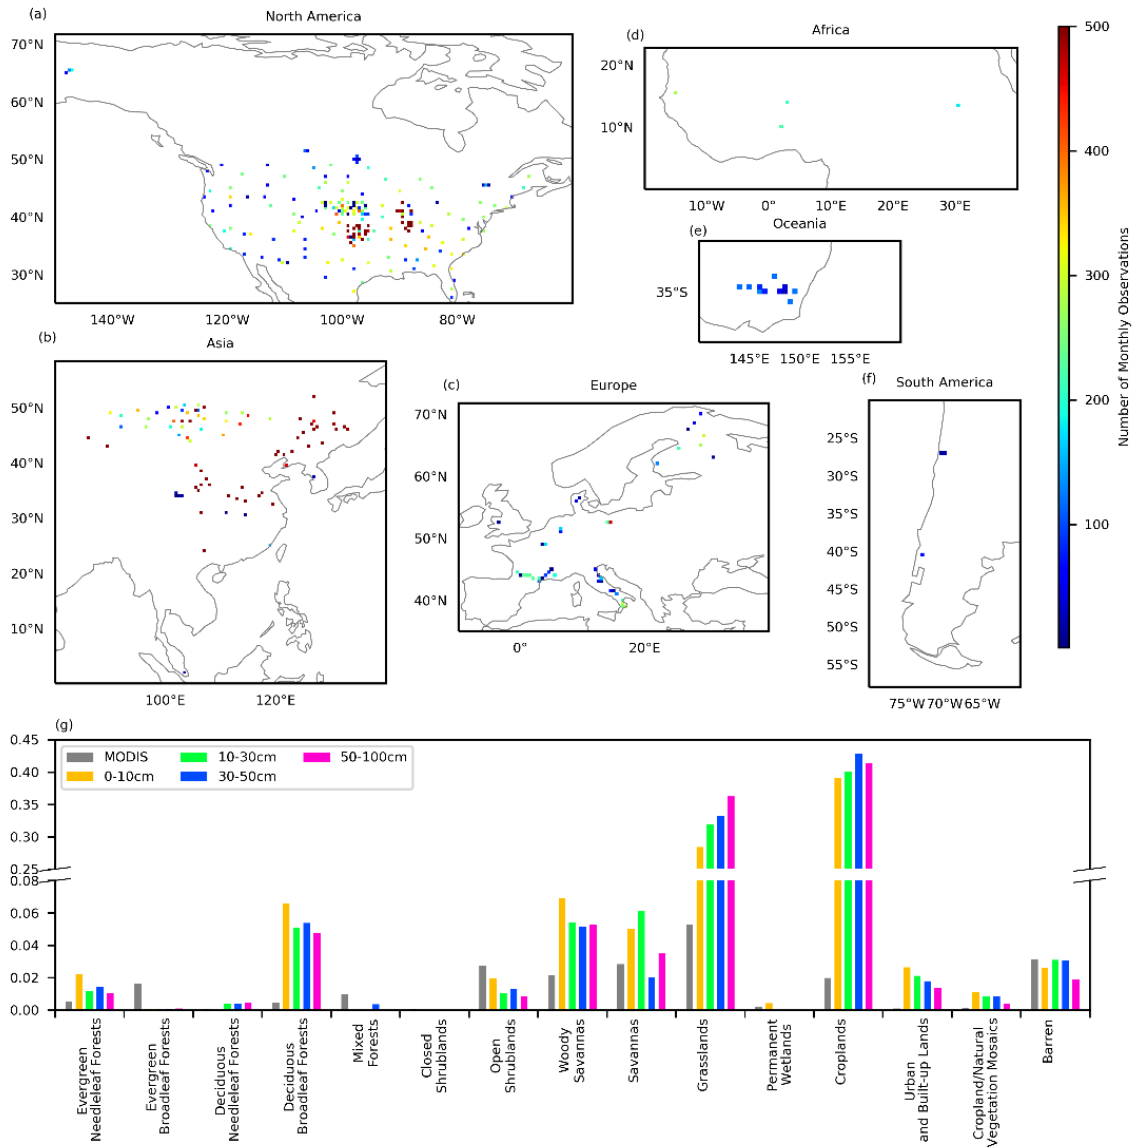

35 **Figure S1: (a–f) Spatial distribution of the SM observations from the ISMN. The colors indicate the number of months that have valid SM observations within each  $0.5^\circ$  grid. When observations exist for more than one of the four target soil layers (0–10, 10–30, 30–50, and 50–100 cm), the number of months for each soil layer was summed up. (g) Fraction of station-months in each land use type according to MODIS IGBP classification (Friedl and Sulla-Menashe, 2015). The fractions of grid cells in each land use type from MODIS are shown for comparison.**

40

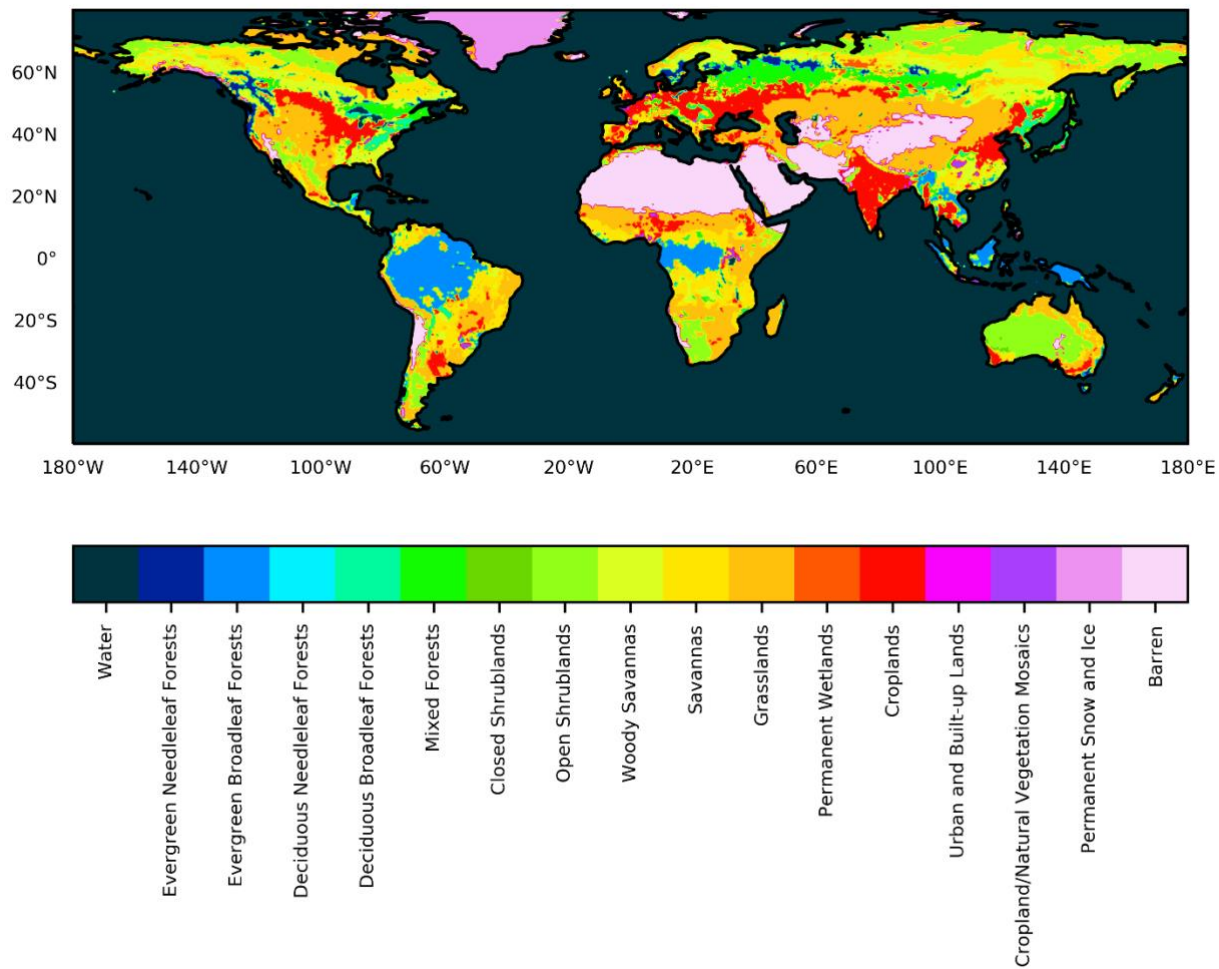

Figure S2: The spatial distribution of IGBP land cover types in the MODIS MCD12C1 product (Friedl and Sulla-Menashe, 2015).

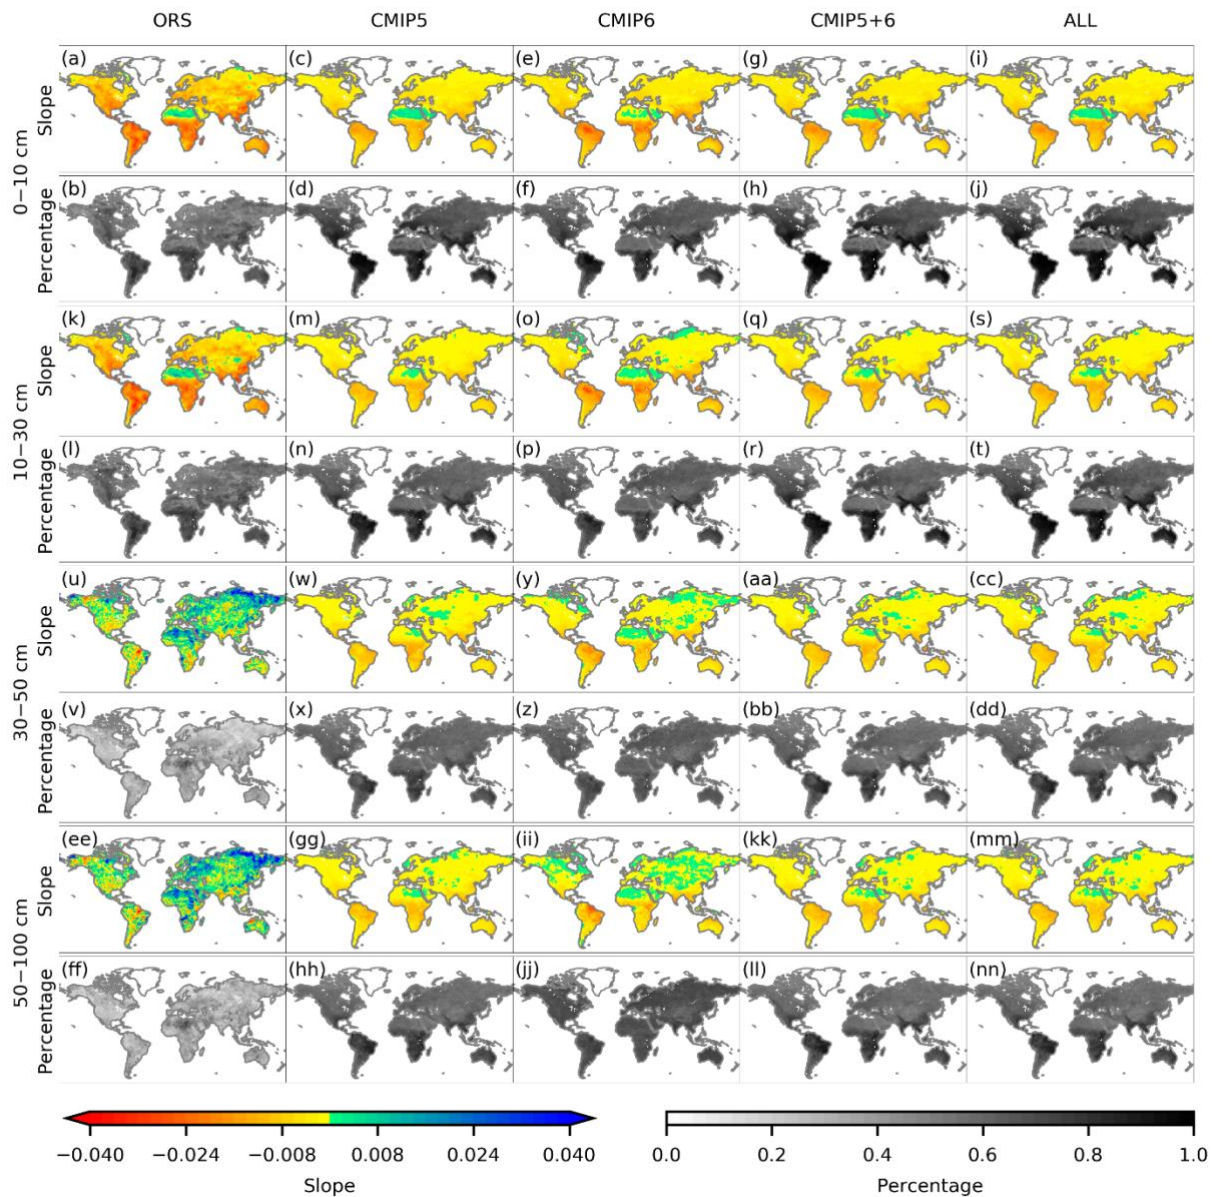

45 **Figure S3: Averaging regression coefficients (significant-only) for the temperature part of the EC relationships, and the percentage of months when temperature was used for the EC.**



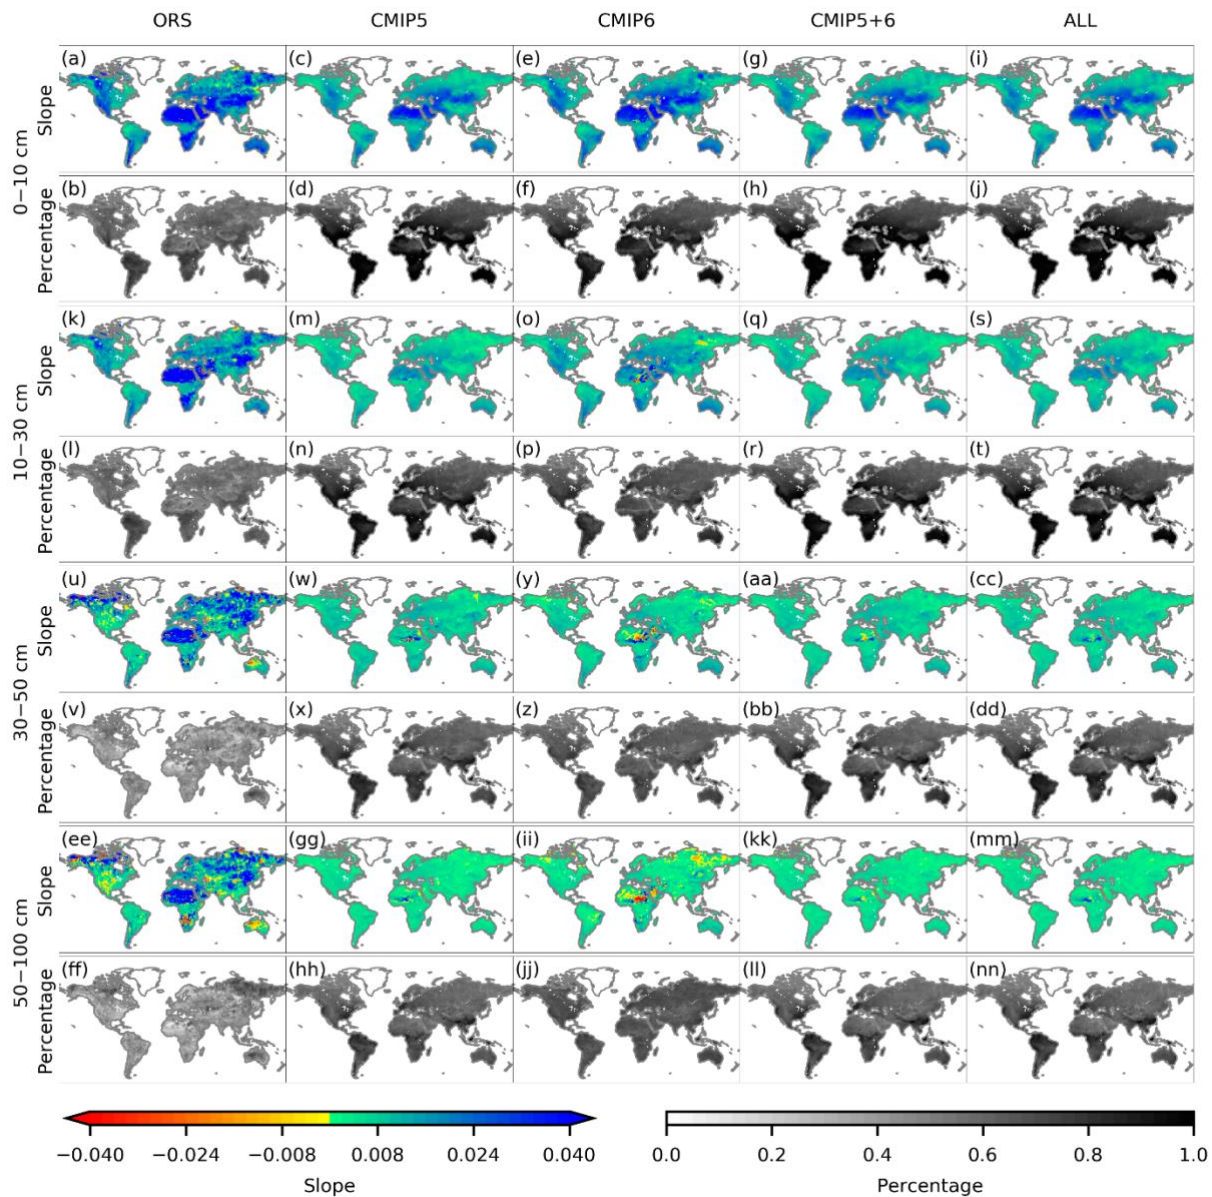

Figure S4: Averaging regression coefficients (significant-only) for the precipitation part of the EC relationships, and the percentage of months when precipitation was used for the EC.

50

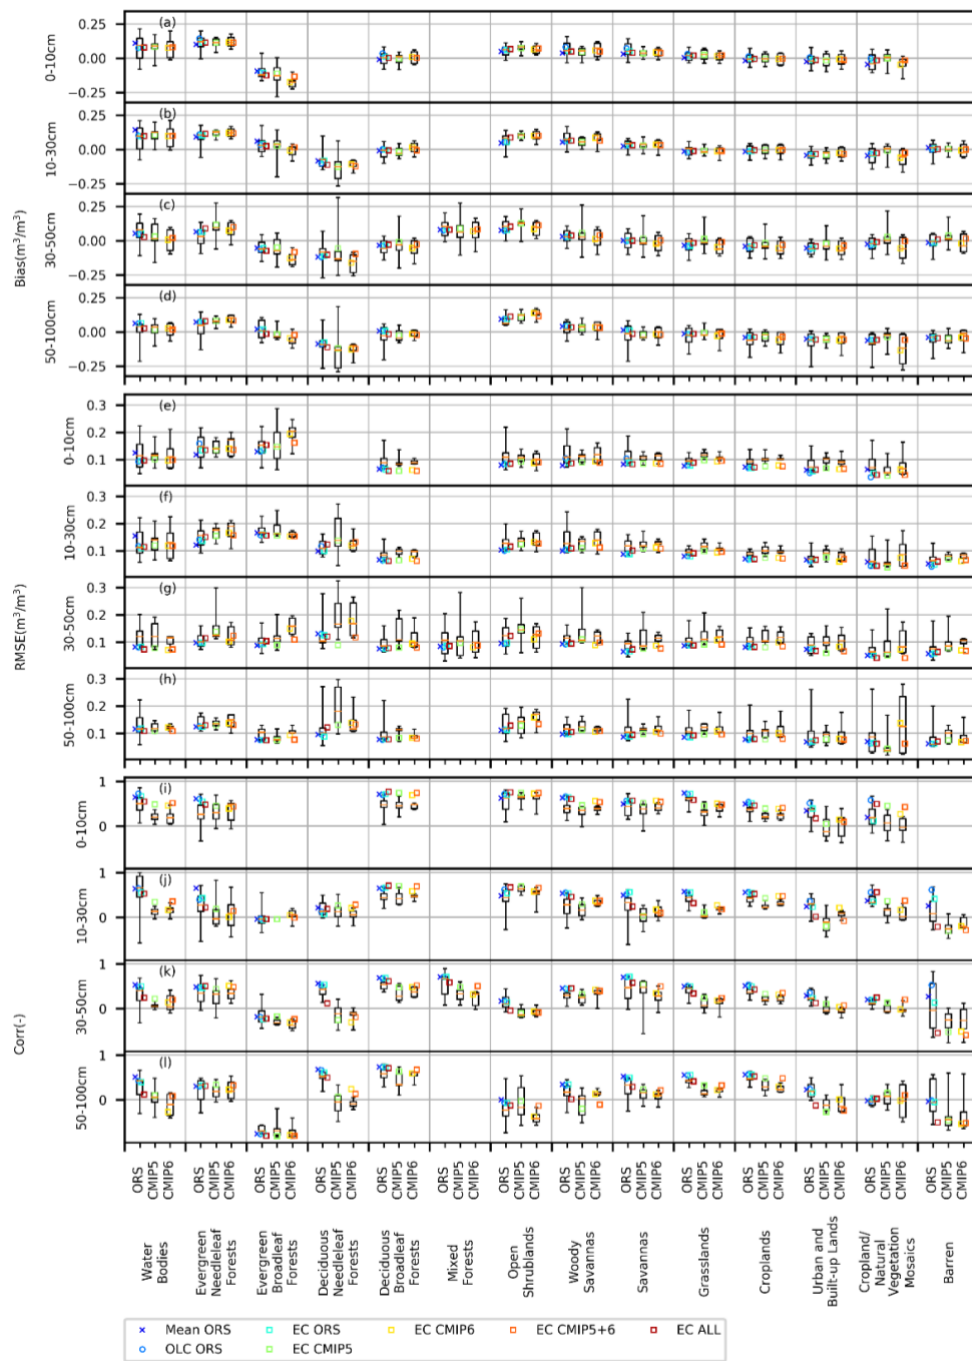

**Figure S5: By land-cover type performance of the original ORS, CMIP5, and CMIP6 datasets (boxplots) and the merged products (scatter plots) on the validation set of observations. The boxplots show (from top to bottom) maximum, 75th percentile, median, 25th percentile, and minimum. The observations were classified into the most prevalent land cover types in their occupying  $0.5^\circ$  grids based on the MODIS MCD12C1 product (Friedl and Sulla-Menashe, 2015). Some land cover types and depths are not displayed because too few data points were available for the calculation of the validation metrics (at least 2 are needed for Bias and RMSE, at least 3 for Corr).**

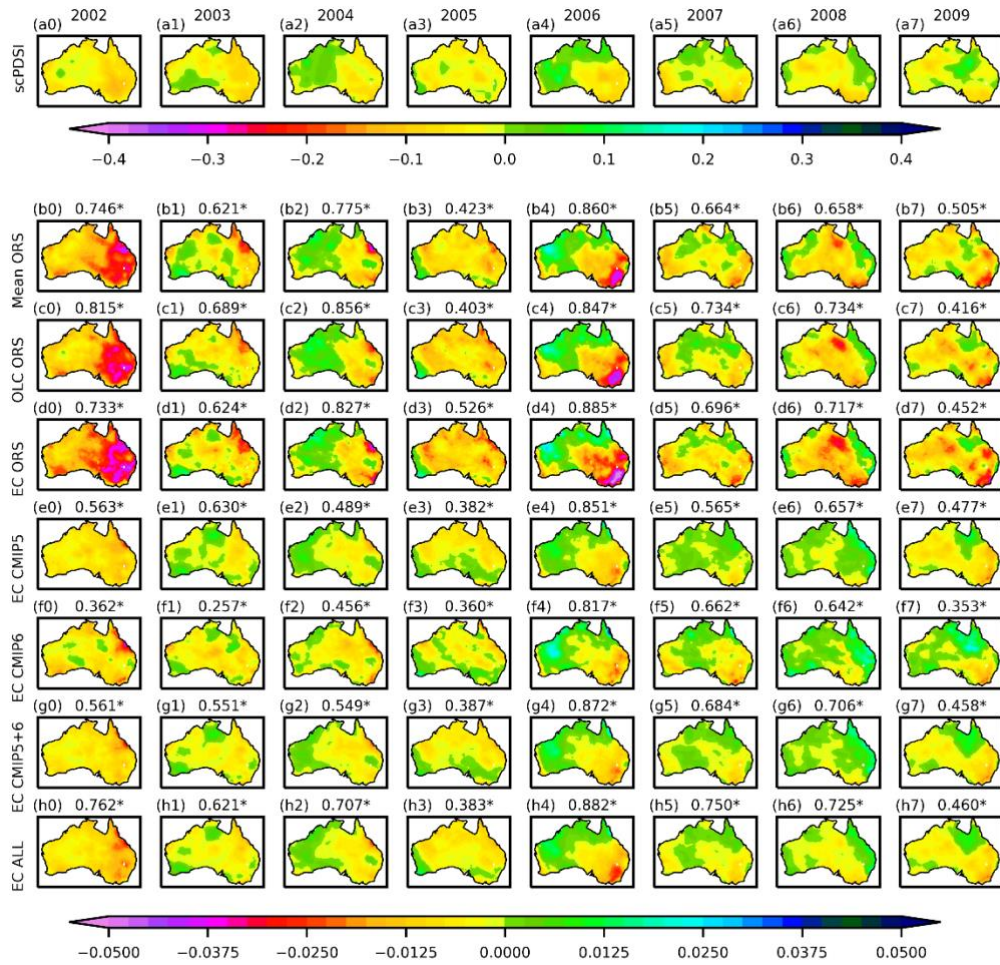

60

**Figure S6: The annual mean scPDSI anomalies (no unit) and annual mean SM anomalies ( $\text{m}^3/\text{m}^3$ ) during the Australian millennium drought 2002–2009. The numbers on top of plots are the Spearman correlation between the anomalies of the merged product and scPDSI, and the asterisk (\*) indicates that the correlation is significant at  $p = 0.05$ . The anomalies were calculated relative to the climatology of 1970–2016. The SM anomalies are for 0–10 cm.**

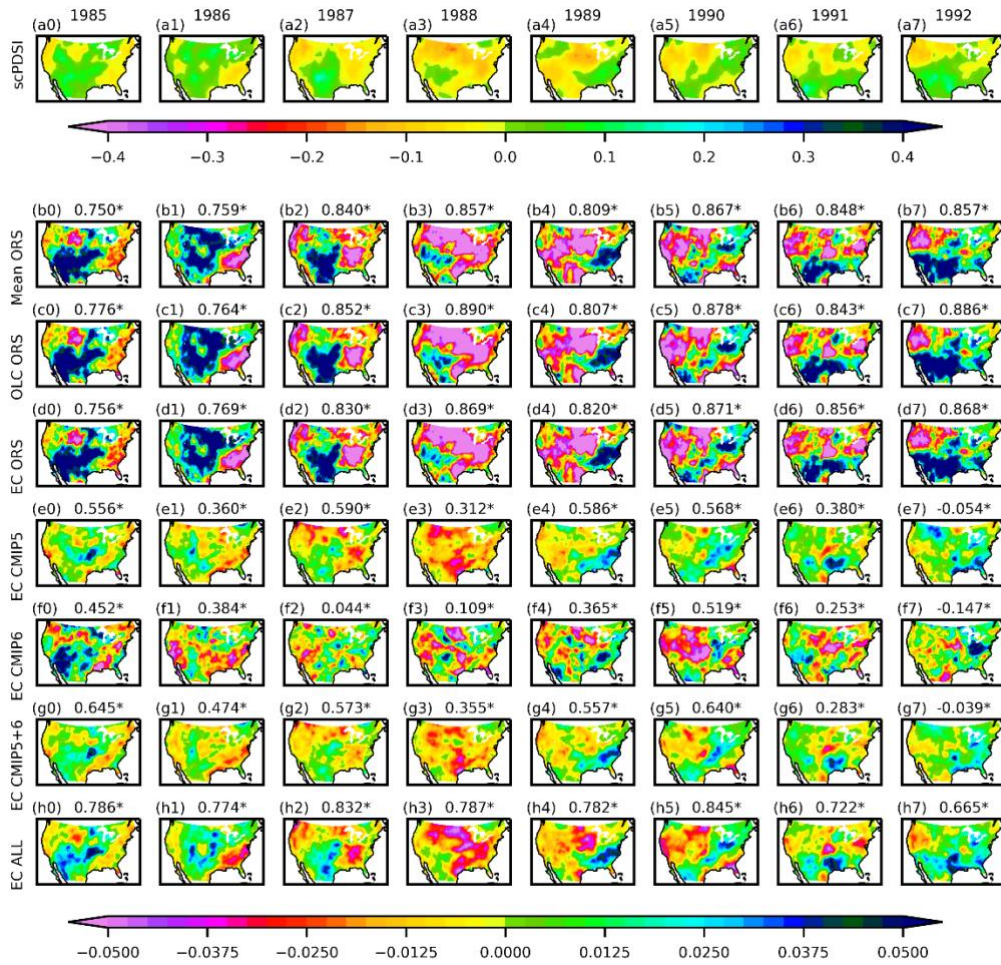

**Figure S7: The annual mean scPDSI anomalies (no unit) and annual mean SM anomalies ( $\text{m}^3/\text{m}^3$ ) during the US drought 1985–1992. The numbers on top of plots are the Spearman correlation between the anomalies of the merged product and scPDSI, and the asterisk (\*) indicates that the correlation is significant at  $p = 0.05$ . The anomalies were calculated relative to the climatology of 1970–2016. The SM anomalies are for 0–100 cm.**

65

70

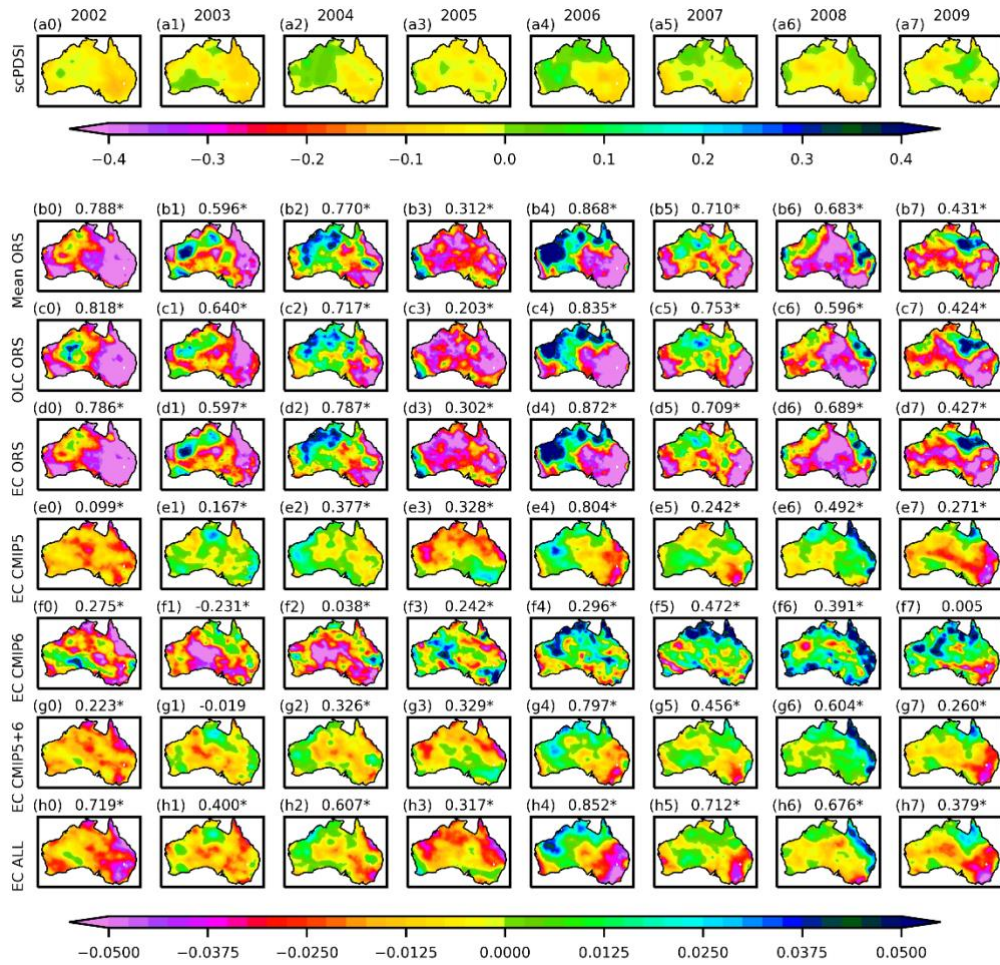

**Figure S8:** The annual mean scPDSI anomalies (no unit) and annual mean SM anomalies ( $\text{m}^3/\text{m}^3$ ) during the Australian millennium drought 2002–2009. The numbers on top of plots are the Spearman correlation between the anomalies of the merged product and scPDSI, and the asterisk (\*) indicates that the correlation is significant at  $p = 0.05$ . The anomalies were calculated relative to the climatology of 1970–2016. The SM anomalies are for 0–100 cm.

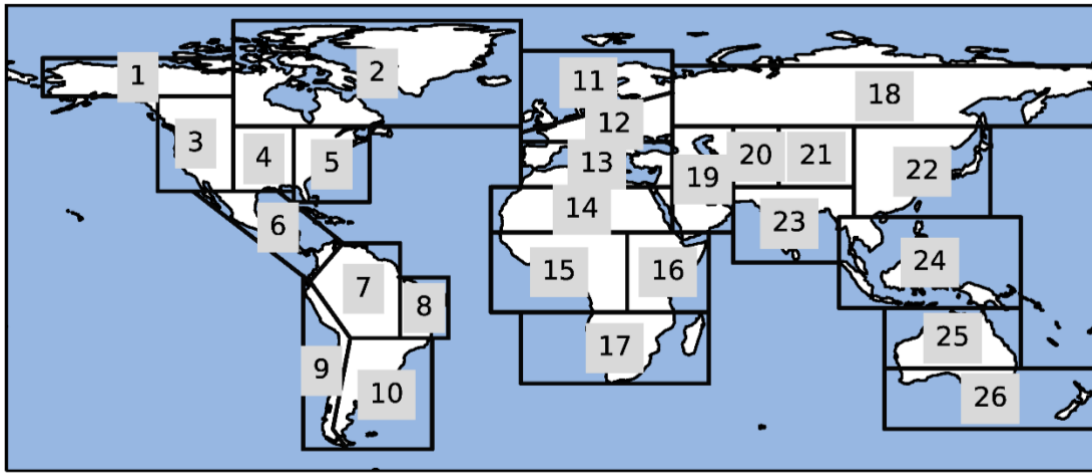

Figure S9: The locations of the IPCC SREX regions. The plot was drawn using the Python package regionmask v0.4.0 (Hauser, 2019).

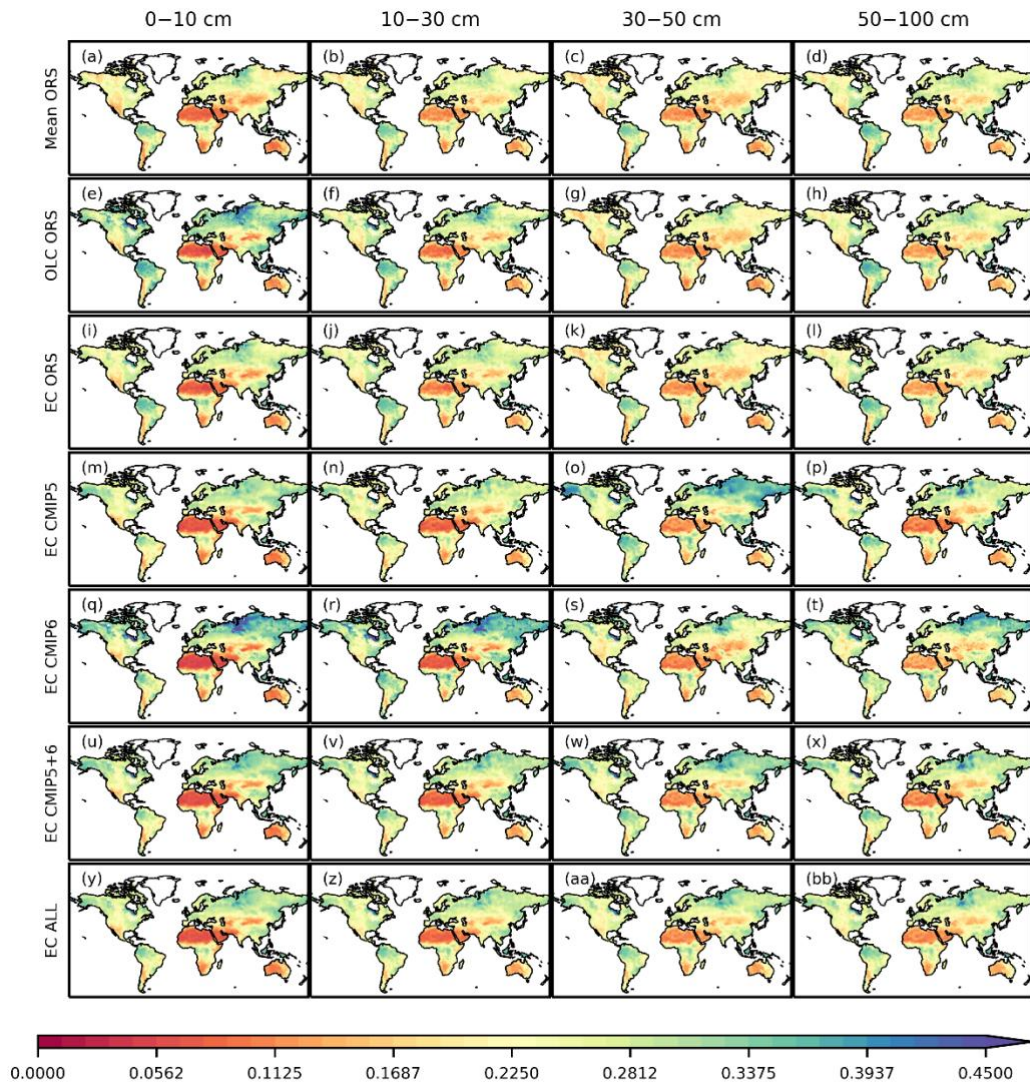

Figure S10: The annual mean climatology of SM ( $\text{m}^3/\text{m}^3$ ) for 1971–2016 in the merged products.

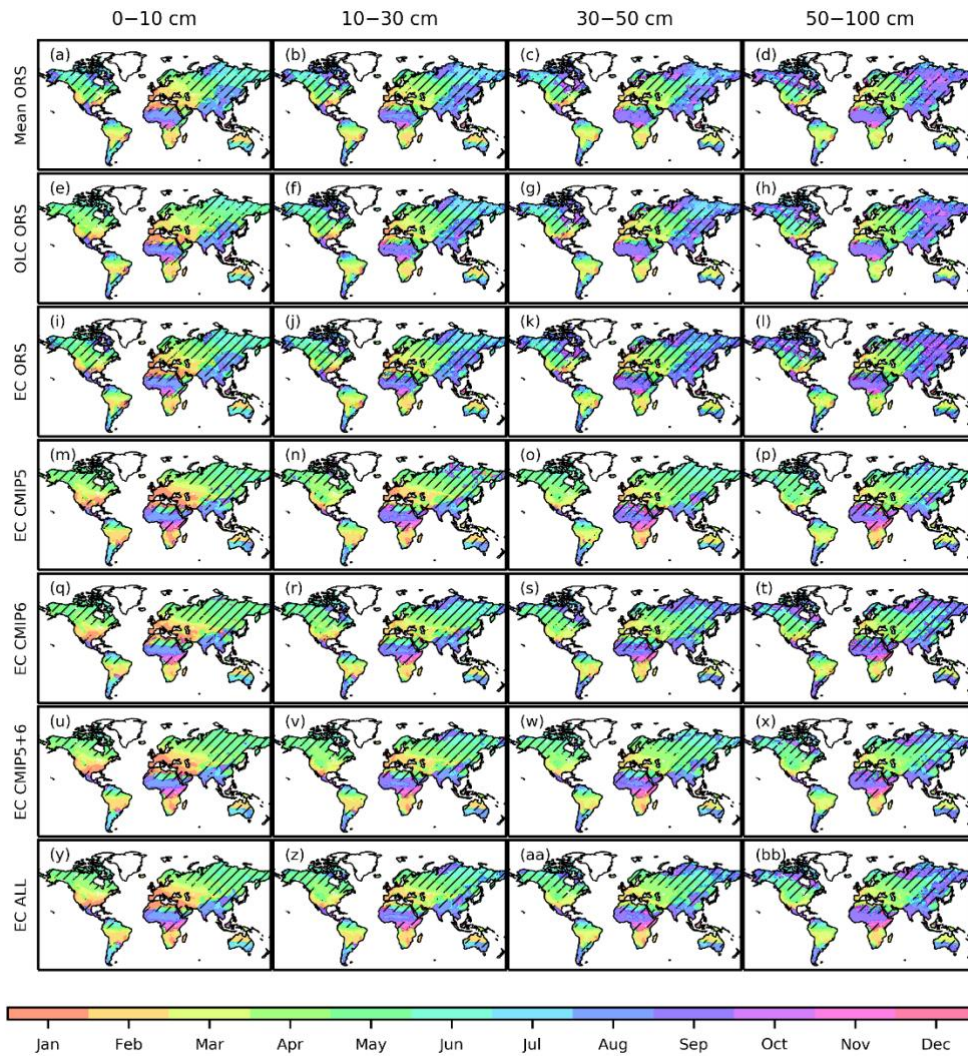

85

**Figure S11: The month of maximum SM in the monthly climatology of 1971–2016 of the merged products. Hatching indicates that more than one local maximum exists in the monthly climatology.**



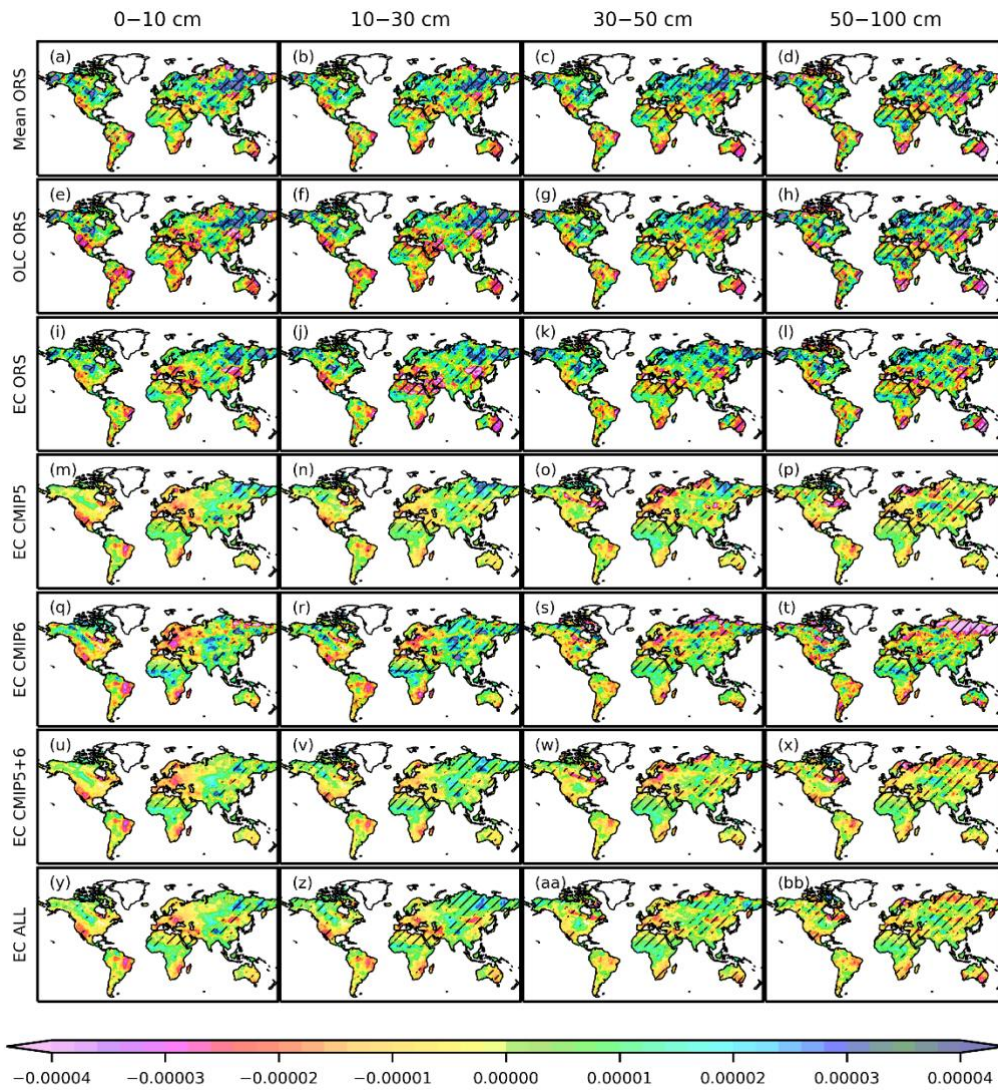

90 **Figure S12: The least squares linear trend in SM ( $\text{m}^3/\text{m}^3$  per year) between 1971 and 2016 in the merged products. Hatching indicates significance at  $p = 0.05$  level. The SM values of all the months of the year were pooled in calculating the trend.**

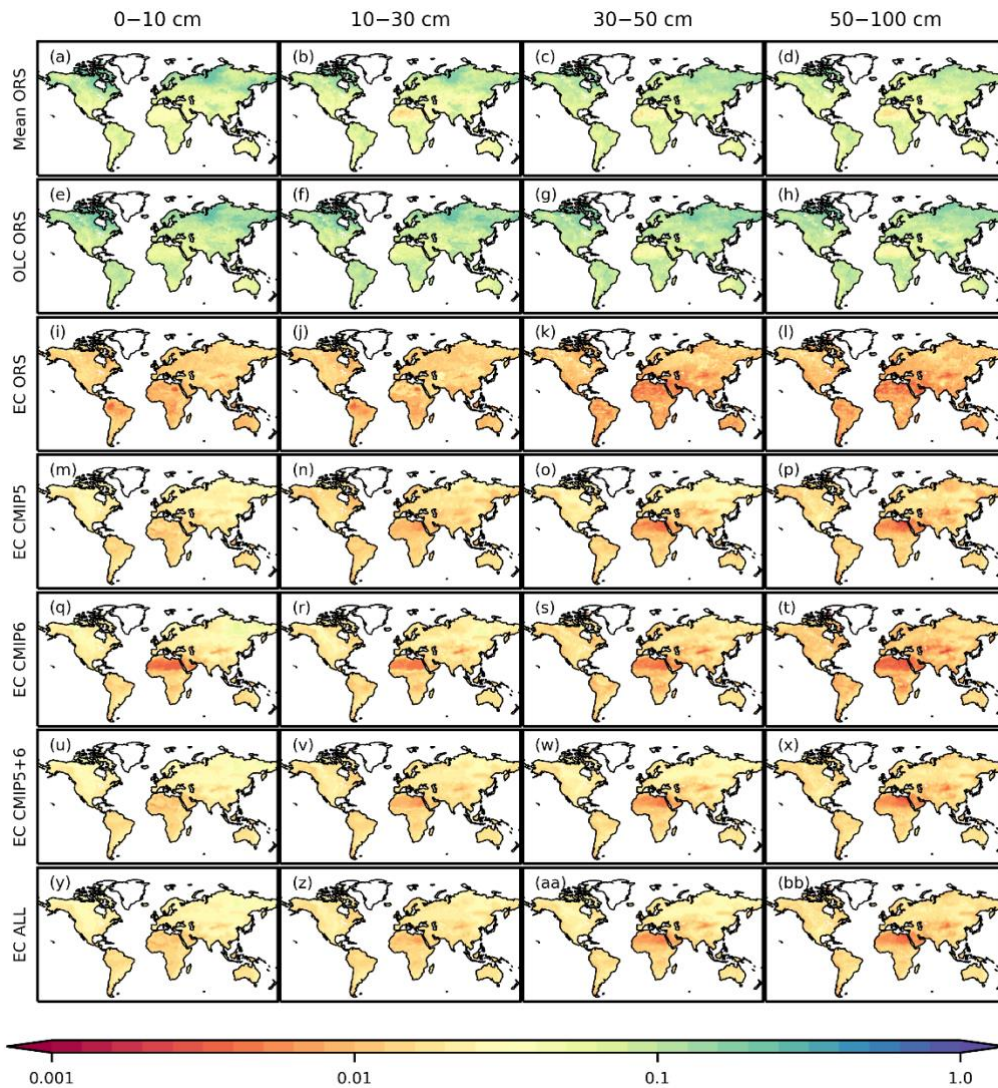

Figure S13: The uncertainty, as characterized by standard deviation, in the estimated SM ( $\text{m}^3/\text{m}^3$ ) between 1971 and 2016 in the merged products. The uncertainty of the Mean ORS product was estimated by the standard deviation of the source datasets at each grid. The uncertainties of the OLC- and EC-based products were estimated following the methods in Sects. 2.7 and 2.8. All the uncertainty values were simply averaged over all time steps in the merged products.

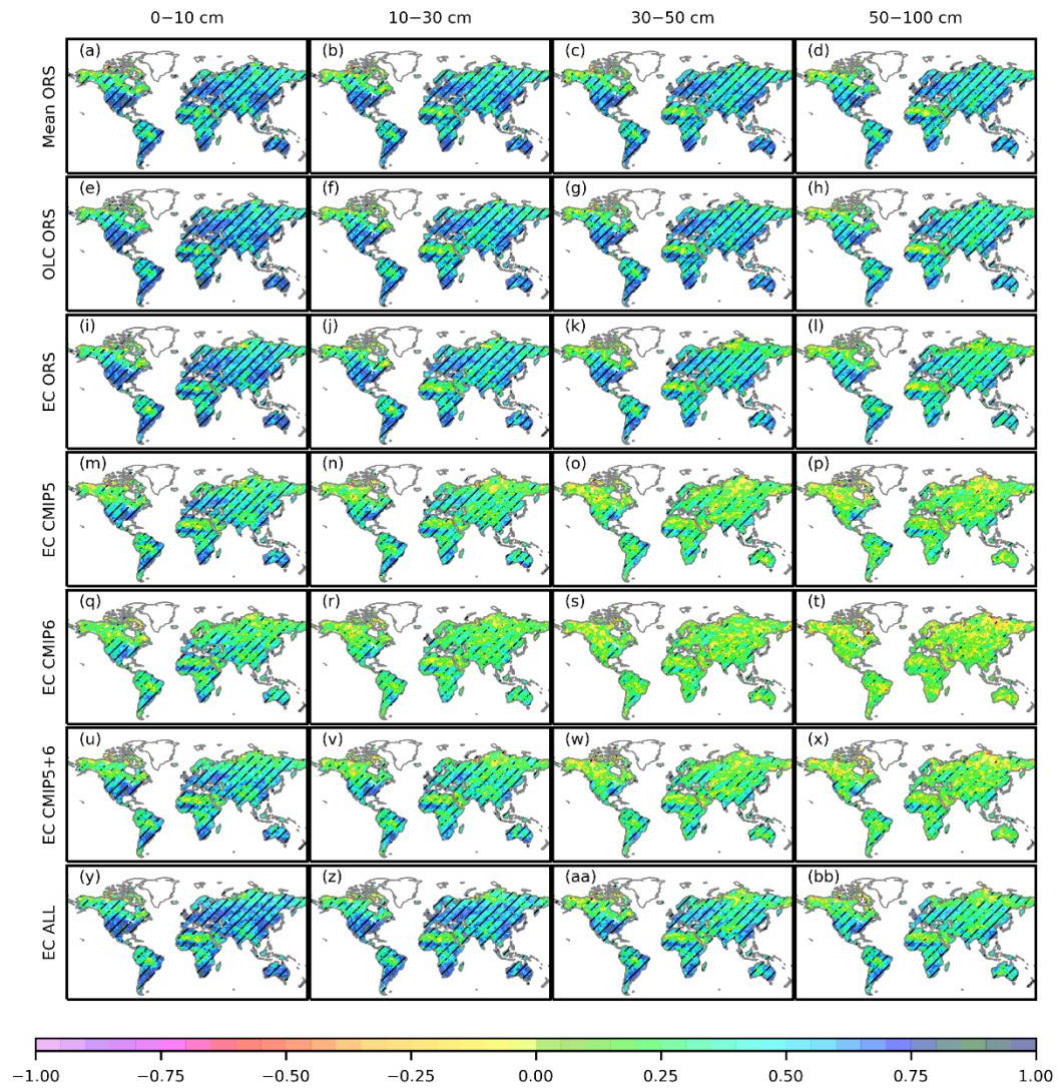

Figure S14: Partial correlation coefficients (no unit) between annual mean SM in the merged products and observed precipitation. Hatching indicates significance at  $p = 0.05$  level.

100

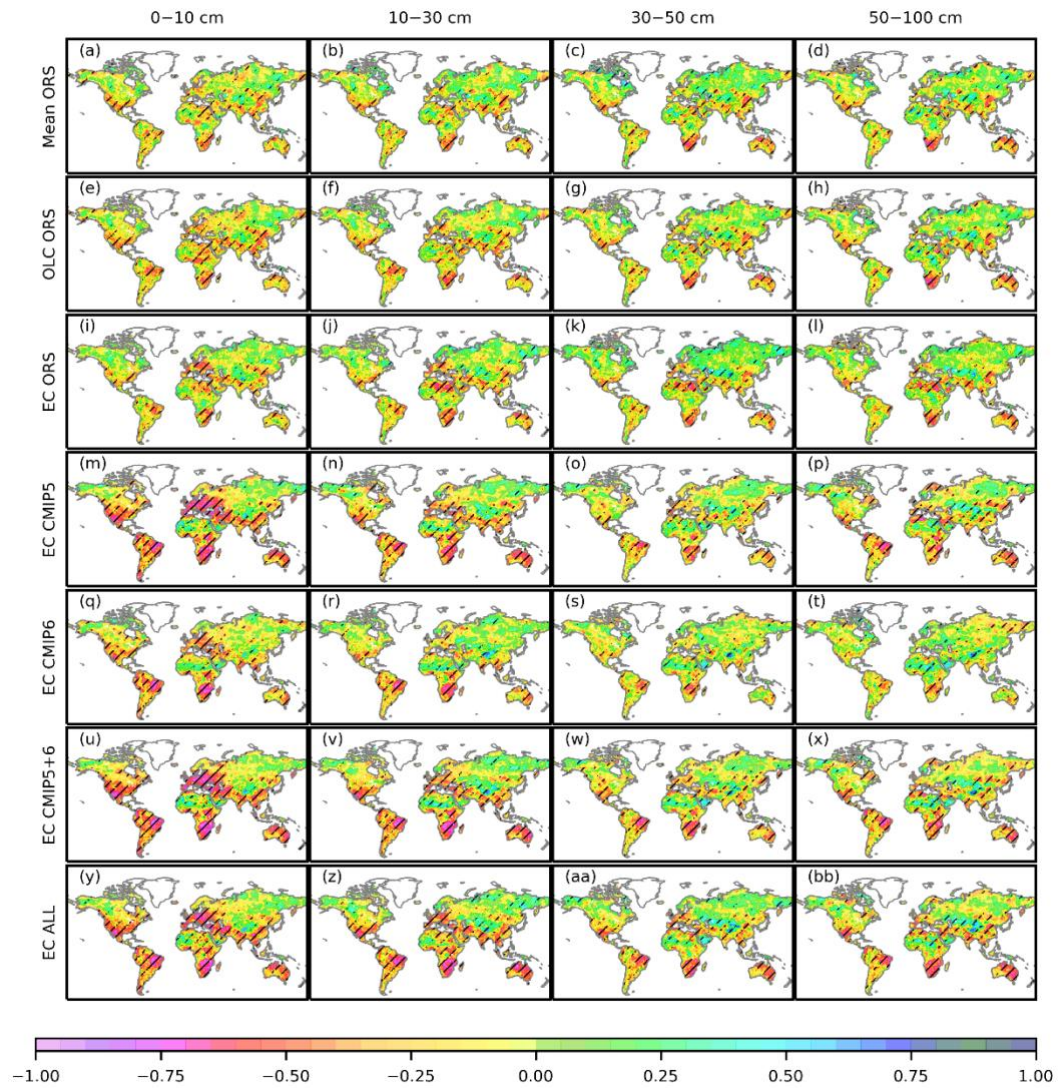

**Figure S15: Partial correlation coefficients (no unit) between annual mean SM in the merged products and observed air temperature. Hatching indicates significance at  $p = 0.05$  level.**

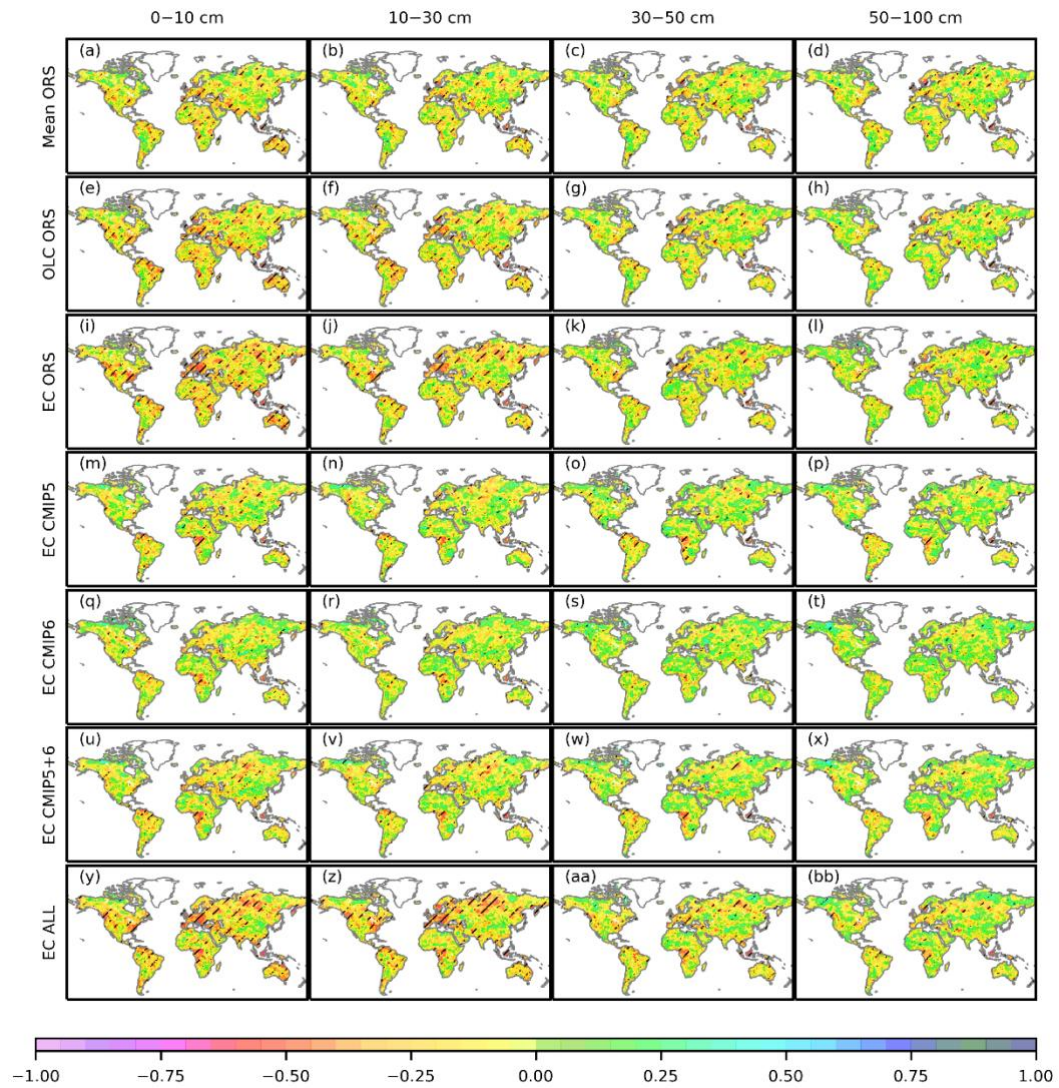

**Figure S16: Partial correlation coefficients (no unit) between annual mean SM in the merged products and observed downwelling shortwave radiation. Hatching indicates significance at  $p = 0.05$  level.**

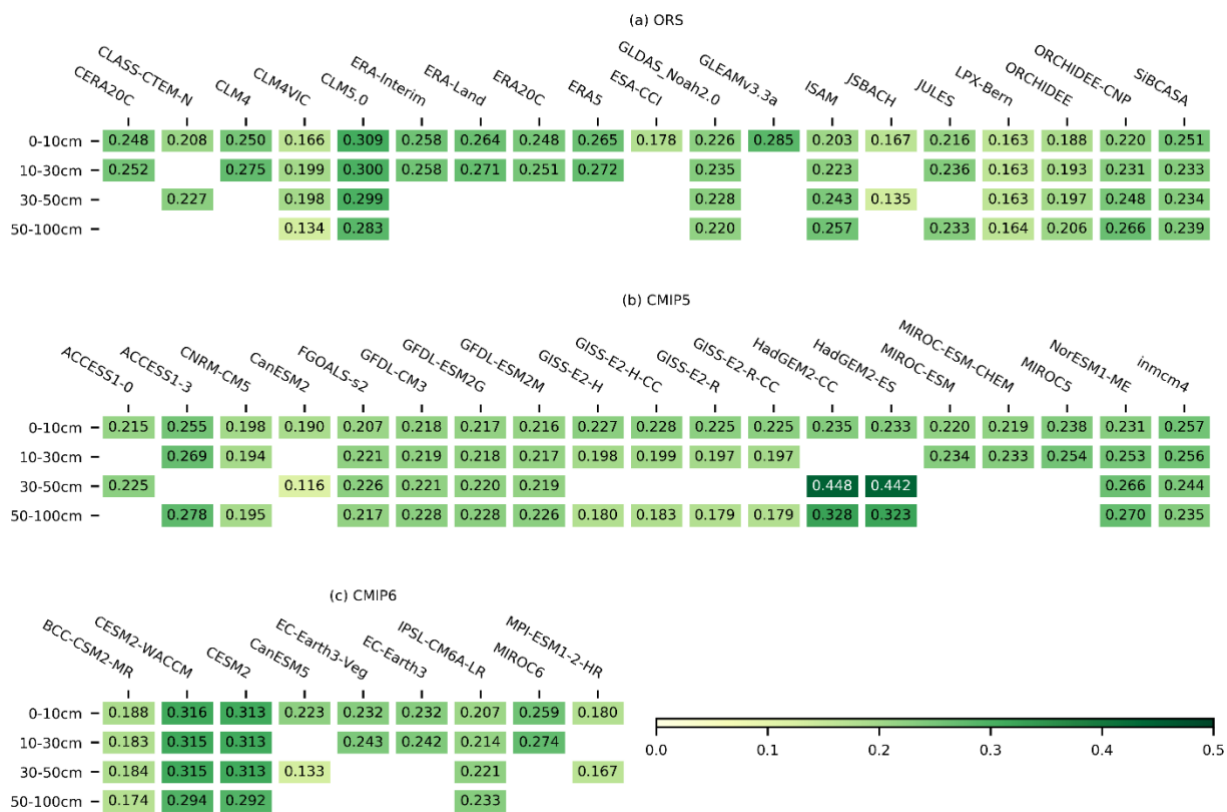

Figure S17: Global mean SM values ( $m^3/m^3$ ) of the source datasets.
